# Supplementary material
Source: publisher figshare collection journal article supplement (https://acs.figshare.com/ndownloader/files/3897394)
Supplement: Supplementary file 1 [file 3897394]

## Supporting Information

### Synthesis of Core-Shell Graphitic Carbon@Silica Nanospheres with Dual-Ordered Mesopores for Cancer-Targeted Photothermochemotherapy

Yi Wang<sup>2</sup>, Kaiyuan Wang<sup>4</sup>, Ren Zhang<sup>2</sup>, Xingang Liu<sup>2</sup>, Xueying Yan<sup>4</sup>, Jianxin Wang<sup>1</sup>, Ernst Wagner<sup>1,3</sup> and Rongqin Huang<sup>1\*</sup>

<sup>1</sup> Department of Pharmaceutics, School of Pharmacy, Key Laboratory of Smart Drug Delivery, Ministry of Education, Fudan University, Shanghai 201203, China

<sup>2</sup> Center of Analysis and Measurement, Fudan University, Shanghai 200433, China

<sup>3</sup> Department of Pharmacy, Ludwig-Maximilians-Universitaet (LMU), Munich, 81377, Germany

<sup>4</sup> School of Pharmacy, Heilongjiang University of Chinese Medicine, Harbin 150040, China

### Supporting Figures

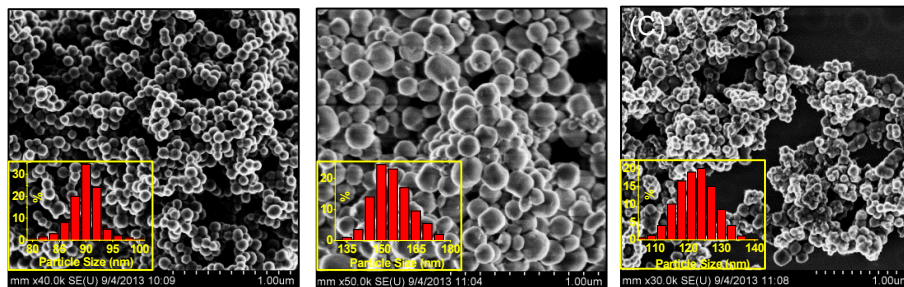

**Figure S1.** SEM images and corresponding particle size distribution curves (insets) of MCN (A), MCN@MS (B) and HMS (C).

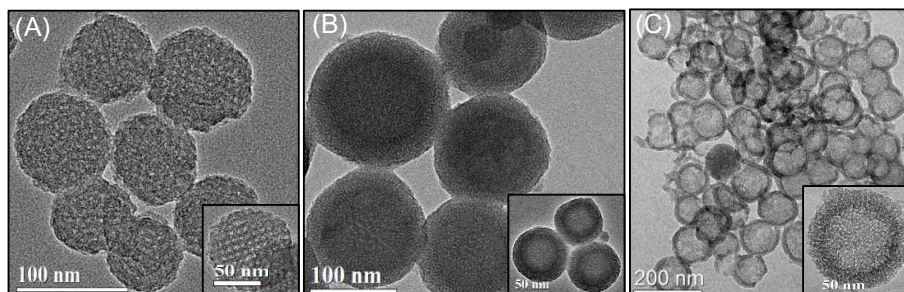

**Figure S2.** TEM and HRTEM (insets) images of MCN (A), MCN@MS (B) and HMS (C).

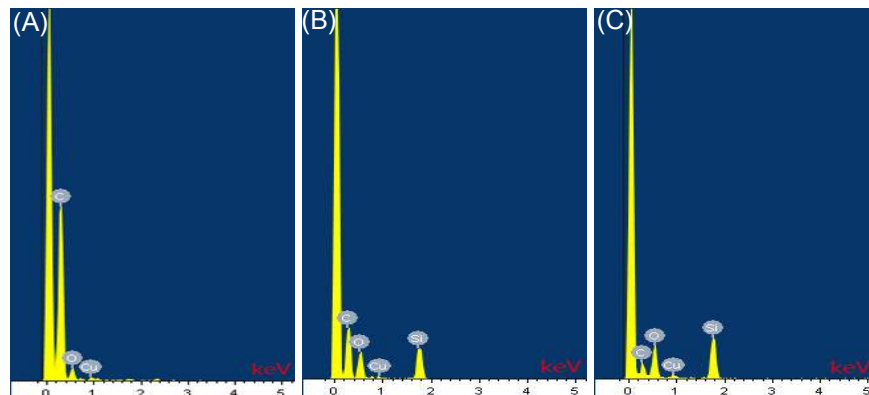

**Figure S3.** EDX patterns of MCN (A), MCN@MS (B) and HMS (C). The Cu and some few C elements came from the TEM grids with holey carbon supporting film.

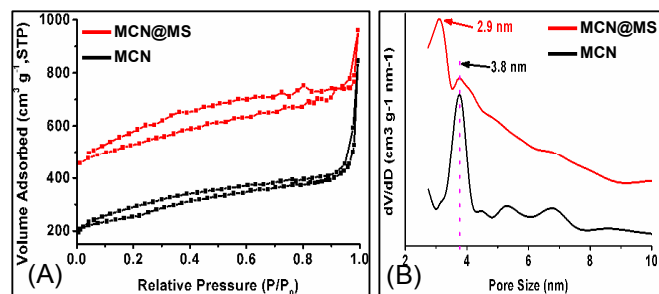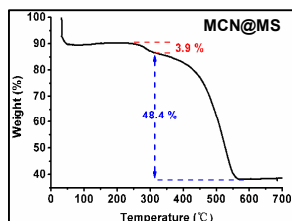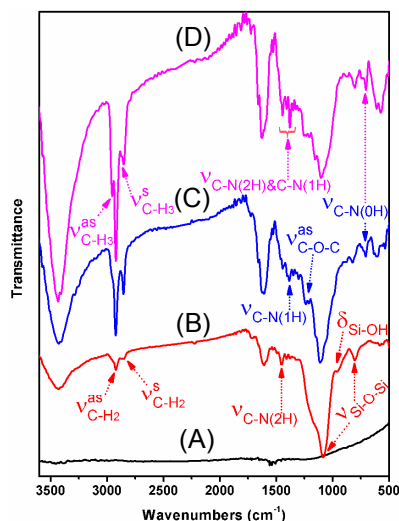

**Figure S6.** IR spectra of MCN (A), MCN@MS (B), MMP (C) and MMPS (D). MCN did not show any peaks since they were graphitic carbon with no infrared activity (A). Obvious peaks such as symmetrical stretching vibration ( $2843\text{ cm}^{-1}$ ,  $\nu^{\text{s}}_{\text{C-H2}}$ ) and asymmetrical stretching vibration ( $2915\text{ cm}^{-1}$ ,  $\nu^{\text{as}}_{\text{C-H2}}$ ) of C-H bonds in the methylene ( $-\text{CH}_2-$ ), C-N stretching vibration of primary amide ( $1448\text{ cm}^{-1}$ ,  $\nu_{\text{C-NH2}}$ ), stretching vibration of Si-O-Si bond (symmetry:  $802\text{ cm}^{-1}$ ,  $\nu^{\text{s}}_{\text{Si-O-Si}}$ ; asymmetry:  $1080\text{ cm}^{-1}$ ,  $\nu^{\text{as}}_{\text{Si-O-Si}}$ ) and bending vibration of Si-OH bond ( $961\text{ cm}^{-1}$ ,  $\delta_{\text{Si-OH}}$ ) emerged in sample MCN@MS, indicating that the amido-mesoporous silica was successfully modified on MCNs (B).<sup>2</sup> After PEGylation, the enhancement of C-H bonds stretching vibration in the methylene ( $-\text{CH}_2-$ ) ( $2843\text{ cm}^{-1}$  &  $2915\text{ cm}^{-1}$ ,  $\nu_{\text{C-H2}}$ ), the emergence of C-O-C bonds asymmetrical stretching vibration ( $1237\text{ cm}^{-1}$ ,  $\nu^{\text{as}}_{\text{C-O-C}}$ ), the transfer of C-N stretching vibration from primary amide ( $1448\text{ cm}^{-1}$ ,  $\nu_{\text{C-NH2}}$ ) to secondary amine ( $1380\text{ cm}^{-1}$ ,  $\nu_{\text{C-NH}}$ ) and tertiary amide ( $707\text{ cm}^{-1}$ ,  $\nu_{\text{C-N}}$ ) were clearly observed in MMP as compared with MCN@MS, proving the accomplished PEGylation (C). The SP13 conjugation was evidenced by two additional C-H bonds stretching vibrations in methyl ( $-\text{CH}_3$ ) ( $2870\text{ cm}^{-1}$ ,  $\nu^{\text{s}}_{\text{C-H3}}$ ;  $2954\text{ cm}^{-1}$ ,  $\nu^{\text{as}}_{\text{C-H3}}$ ), two much stronger C-H bonds stretching vibrations in the methylene ( $-\text{CH}_2-$ ) ( $2843\text{ cm}^{-1}$ ,  $\nu^{\text{s}}_{\text{C-H2}}$ ;  $2915\text{ cm}^{-1}$ ,  $\nu^{\text{as}}_{\text{C-H2}}$ ), and much more obvious C-N stretching vibration at  $1300\text{-}1500\text{ cm}^{-1}$  &  $700\text{-}750\text{ cm}^{-1}$  in sample MMPS (D), as compared with MMP.

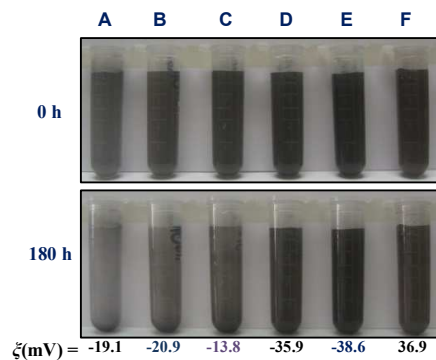

**Figure S7.** Dispersity of MCN (A), MCN@MS without amination (B), MCN@MS (C), MMP (D), MMPS (E) and MMPSD (F) solution. The prepared solutions were kept on standing for 180 h for the comparison. The zeta potentials of different nanoparticles were list below the pictures.

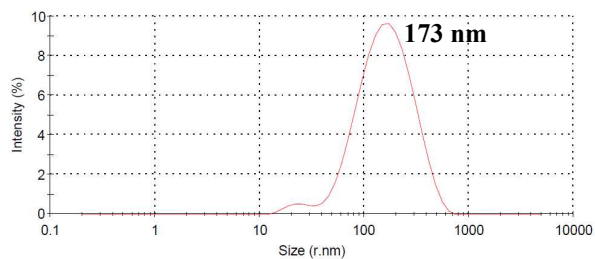

**Figure S8.** Particle size distribution curve of MMPSD measured by dynamic light scattering (DLS).

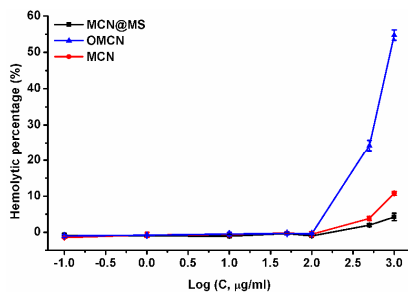

**Figure S9.** The hemolysis comparison of mesoporous silica coated and uncoated nanoparticles. Data were expressed as mean  $\pm$  S.E.M. (n = 4).

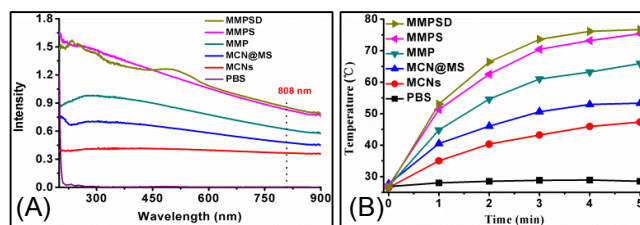

**Figure S10.** UV-vis spectra (A) and photothermal heating curves (B) ( $3.75 \text{ W cm}^{-2}$  NIR at 808 nm) of different carriers with MCNs or MCN@MS concentration at  $50 \text{ μg/ml}$ .

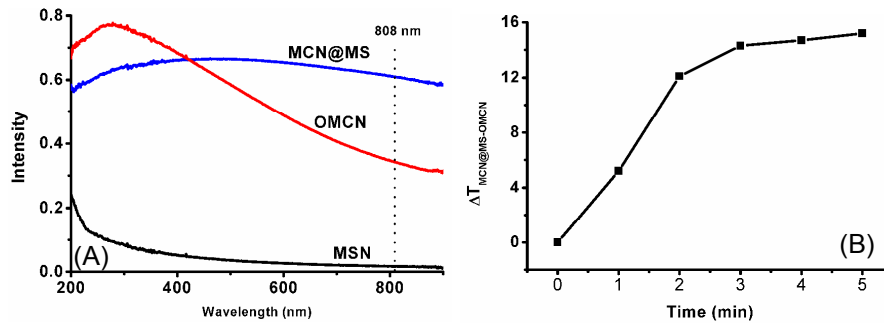

**Figure S11.** UV-vis absorption curves of samples with the same MCN (or MSN) concentration (A) and photothermal heating temperature differences ( $\Delta T$ ) between MCN@MS and OMCN solution with the same MCN concentration *via* NIR irradiation (3.75 W/cm<sup>2</sup>, 808 nm) for different time periods (B).

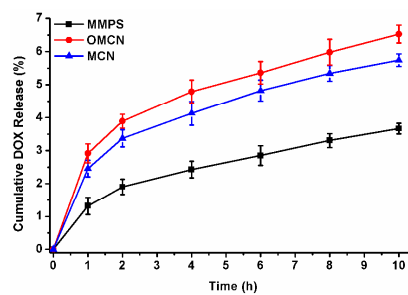

**Figure S12.** The cumulative DOX release profiles from different vectors under pH = 6.0.

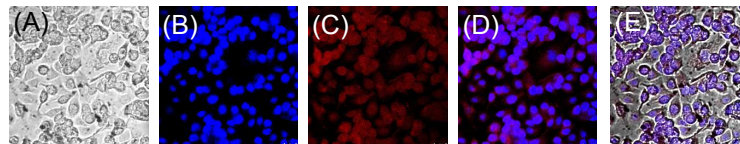

**Figure S13** Intracellular localization of DOX within SK-BR-3 cells while incubated with MMPSD for 30 min. (A): bright field, (B): DAPI-stained nuclei, (C): DOX from MMPSD, (D): merged image of (B) and (C), (E): merged image of (A), (B) and (C). Bar = 50  $\mu$ m.

**Table S1**

Textual Properties of Different Samples.

| Sample | BET surface area<br>(m <sup>2</sup> g <sup>-1</sup> ) | Total pore volume<br>(cm <sup>3</sup> g <sup>-1</sup> ) | Unit<br>(a <sub>0</sub> )(nm) | cell Pore<br>(D)(nm) | diameter<br>(nm) | Wall thickness (t)<br>(nm) |
|--------|-------------------------------------------------------|---------------------------------------------------------|-------------------------------|----------------------|------------------|----------------------------|
| MCNs   | 864                                                   | 0.94                                                    | 12.2                          | 3.8                  |                  | 6.7                        |
| MCN@MS | 518                                                   | 0.71                                                    | 5.6 <sup>a</sup>              | 2.9 <sup>a</sup>     |                  | 2.7 <sup>a</sup>           |
| HMS    | -                                                     | -                                                       | 4.5                           | 2.5                  |                  | 2.0                        |

\*a: The textual parameters of mesoporous silica coating, while the textual parameters of MCN was not obviously affected in MCN@MS.

\*P6mm mesostructure (MCN@MS and HMS):  $d_{100} = 2\pi/q_{100}$ ,  $a_0 = 2d_{100}/\sqrt{3}$ ,  $t = a_0 - D$ .  $\pi=3.1415926$ .<sup>3</sup>

\*1m3m mesostructure (MCN@MS and MCNs):  $d_{110} = 2\pi/q_{110}$ ,  $a_0 = \sqrt{2}d_{110}$ ,  $t = \sqrt{3}a_0/2 - D$ .  $\pi=3.1415926$ .<sup>4</sup>

**Table S2**

The Comparisons of Uncoated Nanopartilces (OMCN and MCN) with the Coated One (MMPS)

| Samples | Sizes               | Zeta Potentials | Temperature elevation compared to PBS <sup>b</sup> | drug loading capacity (mg/mg) | entrapment efficiency |
|---------|---------------------|-----------------|----------------------------------------------------|-------------------------------|-----------------------|
| MMPS    | 170 nm <sup>a</sup> | -38.6 mV        | 47.0 °C                                            | 1.97 ± 0.28                   | 79 %                  |
| MCN     | 90 nm               | -19.1 mV        | 18.0 °C                                            | 1.60 ± 0.22                   | 64%                   |
| OMCN    | 90 nm               | -43.0 mV        | 9.5 °C                                             | 0.99 ± 0.25                   | 40%                   |

a: This size was measured by DLS. b: Irradiation for 5 minutes under 3.75 W cm<sup>-2</sup> NIR at 808 nm with the same MCN concentration.

**Table S3**

IC<sub>50</sub> (μg/ml) in SK-BR-3 Cells under Different Treatments and the Calculated CI.

| MMPS                 | MMPSD | MMPS+NIR | MMPSD+NIR |       | CI    |
|----------------------|-------|----------|-----------|-------|-------|
| MCN@MS               | DOX   | MCN@MS   | MCN@MS    | DOX   | 0.422 |
| 3.50×10 <sup>7</sup> | 92.61 | 18.03    | 5.10      | 10.05 |       |

## References

- [1] Luan, Z. H., Fournier, J. A., Wooten, J. B., Miser, D. E. Preparation and Characterization of (3-Aminopropyl)triethoxysilane-Modified Mesoporous SBA-15 Silica Molecular Sieves. *Micropor. Mesopor. Mater.* **2005**, *83*, 150-158.
- [2] Wang, Y.; Shi, W.; Song, W. S.; Wang, L.; Liu, X. G.; Chen, J.; Huang, R. Q. Tumor Cell Targeted Delivery by Specific Peptide-Modified Mesoporous Silica Nanoparticles. *J. Mater. Chem.* **2012**, *22*, 14608-14616.
- [3] Wang, Y., Cui, D. M., Li, Q. Z. Synthesis, Characterization and Influence Parameters on the Overgrowth of Micro/Mesoporous Y-Zeolite-MCM-41 Composite Material under Acidic Conditions. *Micropor. Mesopor. Mater.* **2011**, *142*, 503-510.
- [4] Ravikovitch, P. I., Neimark, A. V. Density Functional Theory of Adsorption in Spherical Cavities and Pore Size Characterization of Templated Nanoporous Silicas with Cubic and Three-Dimensional Hexagonal Structures. *Langmuir* **2002**, *18*, 1550-1560.
